# Supplementary material
Source: Springer Nature journal article supplement (https://www.springermedizin.de/resource/supplementary/12913_2012_2803_MOESM2_ESM.pdf/9531386)
Supplement: MOESM2 [file 9531386]

Politicians,  
policymakers,  
bureaucrats

Bureaucratic accountability  
mechanisms

Information, reporting

Oversight, resources, targets

Providers,  
facilities

Services, responsiveness

Preferences, oversight

External accountability  
mechanisms

Citizens,  
patients
